# Supplementary material for: A heat-shock 20 protein isolated from watermelon (ClHSP22.8) negatively regulates the response of Arabidopsis to salt stress via multiple signaling pathways
Source: PeerJ. 2021 Mar 1;9:e10524. doi: 10.7717/peerj.10524 (PMC7931717; doi:10.7717/peerj.10524)
Supplement: Supplemental Information 4 [file peerj-09-10524-s004.xlsx]

## Sheet: Sheet1
Table S1 Primers used in this study
Primer name	Primer sequence
Primers used in transgenetic plant construction
Pro22.8-S	TCCCCCGGG GTTCGGTCTTTGGGTTG
Pro22.8-A	TCCCCCGGG GCGGTCTCCTTCCAGTC
OE22.8-S	GCTCTAGA ATGTCGCTCCGTTTCAG
OE22.8-A	CGGGATCC ATGGCCAGAAATCTGGAC
Primers used in transgenetic plant detection
HSP22.8-S	ATGTCGCTCCGTTTCAG
GUS-A	TAGTGCCTTGTCCAGTTGC
Primers used in subcellular localization
subClHSP22.8-S	CGGGATCCATGTCGCTCCGTTTCAG
subClHSP22.8-A	GCTCTAGATTAATGGCCAGAAATCTGG
qRT-PCR primers
β-actin-S	CCATGTATGTTGCCATCCAG
β-actin-A	GGATAGCATGGGGTAGAGCA
ClHSP22.8-S	CGGATGTGGATAAGGTGAG
ClHSP22.8-A	CGTGGGTTTCTTGAAGTGG
ACTIN2-S	GGTAACATTGTGCTCAGTGGTGG
ACTIN2-S	AACGACCTTAATCTTCATGCTGC
AtNCED3-S	GCCGAAGATTCATCGAACAT
AtNCED3-A	CGAGTTGATTCACCGGTTTT
AtABI4-S	TCAATAACTCATCCACCGC
AtABI4-A	AAAATCCCAAATACTCCCC
AtDREB1B -S	AGCCAGCCAACCACACAG
AtDREB1B -A	TAGCGAAGCAATCCCACG
AtERF5-S	TGAAGACGGAACAGAGCG
AtERF5-A	GGAGATAACGGCGACAGA
AtMYB44-S	GTGGATGAAGCGTGTGG
AtMYB44-A	GAAAGAAGGGCGTGTGT
