# Supplementary material for: A heat-shock 20 protein isolated from watermelon (ClHSP22.8) negatively regulates the response of Arabidopsis to salt stress via multiple signaling pathways
Source: PeerJ. 2021 Mar 1;9:e10524. doi: 10.7717/peerj.10524 (PMC7931717; doi:10.7717/peerj.10524)
Supplement: Supplemental Information 5 [file peerj-09-10524-s005.xlsx]

## Sheet: 启动子预测
		MeJA-responsiveness		Ethylene-responsive element	Gibberellin-responsive element			Abscisic acid responsiveness	Salicylic acid responsiveness	Auxin-responsive element			Heat stress responsiveness	Low-temperature responsiveness	Drought-inducibility
Named	Loci	CGTCA-motif	TGACG-motif	ERE	P-box	GARE-motif	TATC-box	ABRE	TCA-element	TGA-element	AuxRR-core	AuxRE	HSE	LTR	MBS
ClHSP22.8	Cla017945			1		1							1		1

## Sheet: ABA表达
ABA处理	降低
	0 h	1 h	4 h	12 h
ClHSP22.8	1	1.09445	0.523978	0.144269
	0.192225	0.113388	0.0730513	0.0219506
高温	降低
	0 h	1 h	4 h	12 h
ClHSP22.8	1	0.47554	0.929014	0.893755
电子表达谱
osmotic stress	无显著变化
	CK	OS	误差	误差
ClHSP22.8	37.327	46.86	3.462	23.464
低温	CK	Cold	无显著变化
ClHSP22.8	136.17	167.295	1.22857
误差	30.15	35.445
干旱
Y34_CK_4d	693.465		43.405
Y34_drought_4d	1005.7	1.45025	31.64
Y34_CK_8d	944.185		43.655
Y34_drought_8d	974.485	1.03209	18.345
M20_CK_4d	900.85		71.98
M20_drought_4d	759.23	0.842793	4.93
M20_CK_8d	652.87		18.64
M20_drought_8d	529.72	0.811371	20.15
M20抗旱品种	被干旱抑制
Y34 不抗旱	被干旱诱导
黄瓜同源基因	Csa3G733220	氯化钠	确实是负调控
CK	16.88	5.049
NaCl	9.483	1.432
	0.561789

## Sheet: Table S2
Table S2 The basic information of ClHSP22.8 in watermelon
Named	Loci	Location	Trends	Introns	Size(AA)	Conserved domain	Molecular weight	Isoelectric point	Duplicated genes	Counterparter in Arabidopsis
ClHSP22.8	Cla017945	Chr10 : 27430544 .. 27431125	-	0	193	α-crystallin ACD/HSP20	22.8497	7.76	ClHSP16, ClHSP17.6C, and ClHSP17.6D	AT2G29500
