# Supplementary material for: A heat-shock 20 protein isolated from watermelon (ClHSP22.8) negatively regulates the response of Arabidopsis to salt stress via multiple signaling pathways
Source: PeerJ. 2021 Mar 1;9:e10524. doi: 10.7717/peerj.10524 (PMC7931717; doi:10.7717/peerj.10524)
Supplement: Supplemental Information 6 [file peerj-09-10524-s006.xlsx]

## Sheet: Figure 2A
Figure 2A. ClHSP22.8 expression levels in root (R), stem (S), leaf (L), female flower (Ff), male flower (Mf), and fruit (Fr) of watermelon via quantitative real-time PCR analysis (qRT-PCR).
	The ralative expression levels	Positive error	Negative error
R	26.6335	0.124587	0.124007
S	1.96701	0.0606679	0.0588528
L	5.18026	0.0278804	0.0277312
Ff	51.3742	0.891825	0.876608
Mf	1.5575	0.0359376	0.0351271
Fr	1	0.0486463	0.0463896

## Sheet: Figure 3A and B
Figure 3A and B. ClHSP22.8 expression levels in watermelon leaves exposed to 100 μM ABA at 0, 1, 4, and 24 h via qRT-PCR.
	The ralative expression levels	Positive error	Negative error	Significant differences
0 h	1	0.192225	0.192225
1 h	1.09445	0.113388	0.113388
4 h	0.523978	0.0730513	0.0730513	**
12 h	0.144269	0.0219506	0.0219506	**
Raw data 2.2 ClHSP22.8 expression levels in watermelon leaves exposed to 200 mM NaCl at 0, 1, 4, and 24 h via qRT-PCR.
	The ralative expression levels	Positive error	Negative error	Significant differences
0 h	1	0.0695846	0.0650576
1 h	0.21408	0.0244585	0.0219506	**
4 h	0.163297	0.00370562	0.0036234	**
12 h	0.618003	0.038136	0.0359195	**

## Sheet: Figure 4A
Figure 4A. Relative gene expression of ClHSP22.8 in different overexpression Arabidopsis transgenic lines and WT.
	The ralative expression levels	Positive error	Negative error	Significant differences
WT	1	0.017329	0.167511
oe22.8-1	8.60215	0.912845	0.825249	**
oe22.8-2	20.3178	1.12589	1.06677	**
oe22.8-3	16.3839	0.928551	0.878736	**
oe22.8-4	27.2001	2.19371	2.02995	**

## Sheet: Figure 5
Figure 5 Expression profiles of ABA- and stress-related genes in WT and ClHSP22.8 overexpressing Arabidopsis plants. * and ** represent significant differences from the control at values of P < 0.05 and P < 0.01, respectively, as determined by Student’s t-test.
AtNCED3	The ralative expression levels	Positive error	Negative error	Significant differences
WT	1	0.107334	0.0969304
OE22.8-2	0.502796	0.00693503	0.00684068	*
OE22.8-4	0.319563	0.0244585	0.0219506	**
AtABI4
WT	1	0.0550027	0.0521351
OE22.8-2	0.47325	0.0547939	0.0491081	**
OE22.8-4	0.331828	0.074955	0.0611436	**
AtMYB44
WT	1	0.132357	0.116886
OE22.8-2	0.587605	0.0748884	0.064918	**
OE22.8-4	0.467421	0.0175439	0.0169092	**
AtDREB1B
WT	1	0.0965733	0.0880683
OE22.8-2	0.290706	0.0187648	0.017627	**
OE22.8-4	0.18672	0.00760257	0.00730513	**
AtERF05
WT	1	0.165497	0.141997
OE22.8-2	0.31408	0.0244585	0.0219506	*
OE22.8-4	0.281117	0.0034528	0.00338821	**
AtZAT7
WT	1	0.045535	0.0435519
OE22.8-2	0.586184	0.13288	0.110559	*
OE22.8-4	0.42729	0.0147337	0.0142426	**

## Sheet: Figure 6
Figure 6 Expression profiles of ABA- and stress-related genes in three-week-old WT and ClHSP22.8 overexpressing Arabidopsis plants 24 h after salt treatment. The changes observed in WT were normalized. * and ** represent significant differences between the mock- and salt-treatment OE22.8 plants at values of P < 0.05 and P < 0.01, respectively, as determined by Student’s t-test.
AtNCED3	The ralative expression levels	Positive error	Negative error	Significant differences
WT	1	0.107334	0.0969304
	1	0.0109528	0.0108341
OE22.8-2	0.502796	0.00693503	0.00684068
	0.274954	0.00761641	0.00753795	**
OE22.8-4	0.319563	0.0244585	0.0219506
	0.198525	0.0426556	0.0382819	**
AtABI4
WT	1	0.0550027	0.0521351
	1	0.128066	0.113527
OE22.8-2	0.47325	0.0547939	0.0491081
	0.354644	0.0118863	0.0115008	*
OE22.8-4	0.331828	0.074955	0.0611436
	0.187159	0.0137933	0.0128466	**
AtMYB44
WT	1	0.132357	0.116886
	1	0.0330712	0.0323168
OE22.8-2	0.587605	0.0748884	0.064918
	0.54122	0	0.0334745
OE22.8-4	0.467421	0.0175439	0.0169092
	0.373598	0.0123986	0.012042	*
AtDREB1B
WT	1	0.0965733	0.0880683
	1	0.0699425	0.0653703
OE22.8-2	0.290706	0.0187648	0.017627
	0.189471	0.0446757	0.0361514	*
OE22.8-4	0.18672	0.00760257	0.00730513
	0.138667	0.0120412	0.0110792	*
AtERF05
WT	1	0.165497	0.141997
	1	0.139733	0.119156
OE22.8-2	0.31408	0.0244585	0.0219506
	0.306468	0.0775745	0.0737242
OE22.8-4	0.281117	0.0034528	0.00338821
	0.205691	0.0132797	0.0125939	*
AtZAT7
WT	1	0.045535	0.0435519
	1	0.0677437	0.0634457
OE22.8-2	0.586184	0.13288	0.110559
	0.521278	0.0988707	0.0831077
OE22.8-4	0.42729	0.0147337	0.0142426
	0.42916	0.0143289	0.0138659

## Sheet: Figure S3
Figure S3. Expression patterns of ABA- and stress-related genes in response salt stress.
AtNCED3	The ralative expression levels	Positive error	Negative error	Significant differences
WT	1	0.107334	0.0969304
Salt	0.57327	0.00627889	0.00621086	**
AtABI4
WT	1	0.0550027	0.0521351
Salt	0.289966	0.0371346	0.0329189	**
AtMYB44
WT	1	0.132357	0.116886
Salt	2.219	0.073385	0.071711	**
AtDREB1B
WT	1	0.0965733	0.0880683
Salt	4.34991	0.304243	0.284355	**
AtERF05
WT	1	0.165497	0.141997
Salt	0.524015	0.0732221	0.0624396	**
AtZAT7
WT	1	0.045535	0.0435519
Salt	3.04014	0.20595	0.192883	**
